# Supplementary material
Source: Springer Nature journal article supplement (https://www.springermedizin.de/resource/supplementary/12885_2011_2845_MOESM1_ESM.pdf/9462144)

# Cape-Bev vs CAPIRI-Bev

*primary endpoint = TFS*

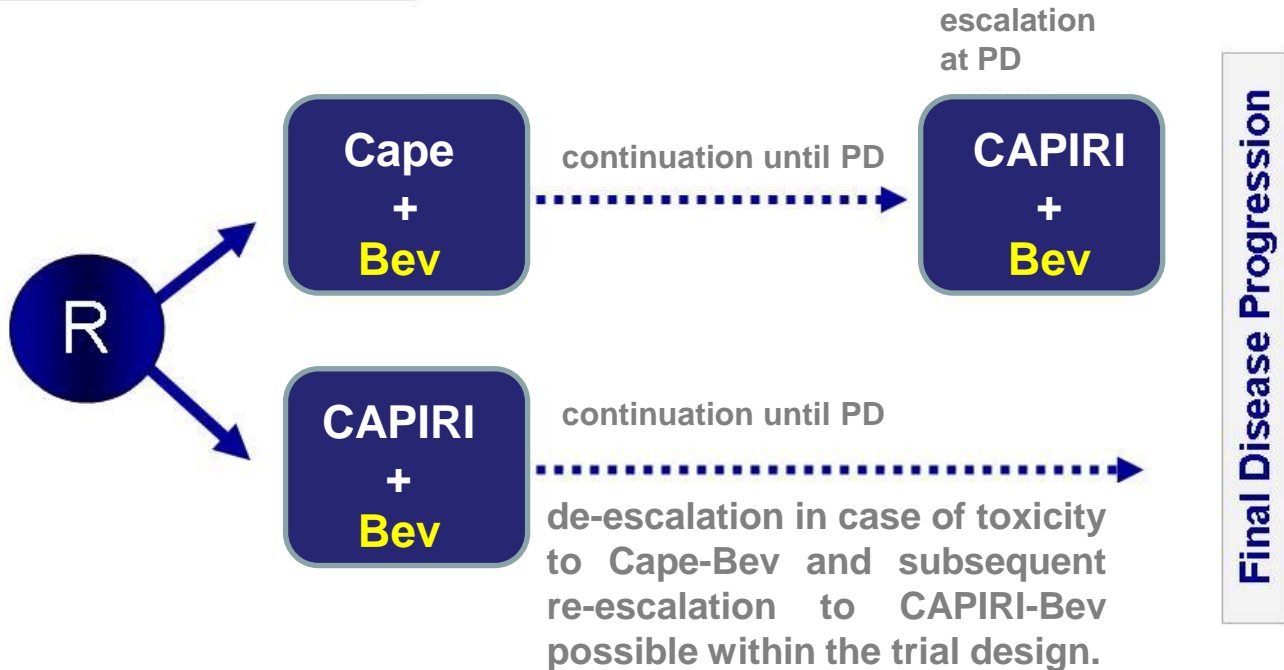

Supplement: MOESM1 [file 9462144]
